# Supplementary material
Source: PubMed Central journal article supplement (PMC5091677)
Supplement: supp_nsw085_scan-15-470-File005.pdf [file supp_nsw085_scan-15-470-File005.pdf]

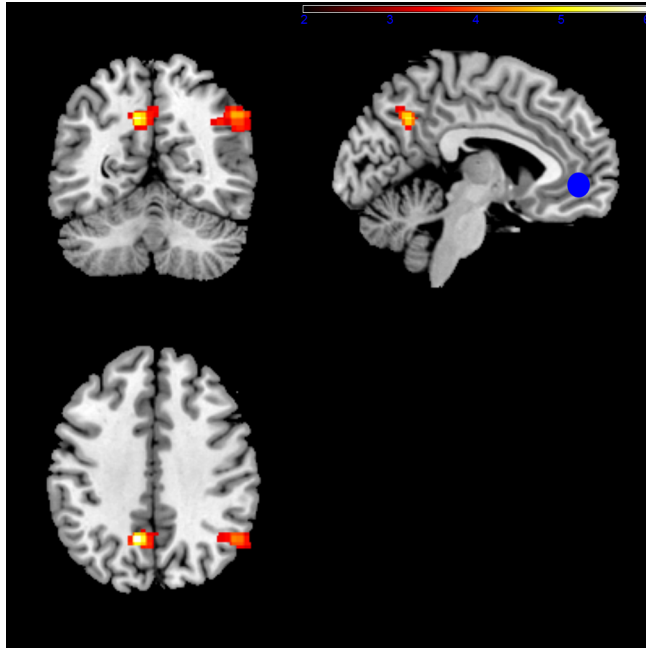

**Supplementary Figure 1:** Seed-based analysis revealed a group by rumination interaction effect by showing a positive correlation between self-reported rumination and resting-state FC between the seed medial PFC (blue) and precuneus/PCC or right angular gyrus in healthy controls and a negative correlation between the same regions in depressed subjects (cluster-extent threshold at family-wise error (FWE)-corrected  $p < 0.05$  and voxel-wise threshold at uncorrected  $p < 0.001$ ).
